# 1 Privacy-preserving harmonization via distributed 2 ComBat

3 Andrew A. Chen<sup>a,b,\*</sup>, Chongliang Luo<sup>c</sup>, Yong Chen<sup>c,1</sup>, Russell T.  
4 Shinohara<sup>a,b,1</sup>, Haochang Shou<sup>a,b,1</sup>, and the Alzheimer's Disease  
5 Neuroimaging Initiative<sup>d</sup>

6 <sup>a</sup>Penn Statistics in Imaging and Visualization Center, Department of  
7 Biostatistics, Epidemiology, and Informatics, University of Pennsylvania,  
8 Philadelphia, PA 19104

9 <sup>b</sup>Center for Biomedical Image Computing and Analytics, University of  
10 Pennsylvania, Philadelphia, PA 19104

11 <sup>c</sup>Department of Biostatistics, Epidemiology and Informatics, University of  
12 Pennsylvania, Philadelphia

13 <sup>d</sup>Data used in preparation of this article were obtained from the Alzheimer's  
14 Disease Neuroimaging Initiative (ADNI) database ([adni.loni.usc.edu](http://adni.loni.usc.edu)). As  
15 such, the investigators within the ADNI contributed to the design and  
16 implementation of ADNI and/or provided data but did not participate in  
17 analysis or writing of this report. A complete listing of ADNI investigators  
18 can be found at: [http://adni.loni.usc.edu/wp-content/uploads/how\\_to\\_app  
19 ly/ADNI\\_Acknowledgement\\_List.pdf](http://adni.loni.usc.edu/wp-content/uploads/how_to_apply/ADNI_Acknowledgement_List.pdf)

20 <sup>1</sup>Equal contribution

21 **\*Correspondence: Andrew A. Chen**

22 [andrewac@pennmedicine.upenn.edu](mailto:andrewac@pennmedicine.upenn.edu)

## 23 Abstract

24 Challenges in clinical data sharing and the need to protect data privacy have led to the  
25 development and popularization of methods that do not require directly transferring pa-  
26 tient data. In neuroimaging, integration of data across multiple institutions also introduces  
27 unwanted biases driven by scanner differences. These scanner effects have been shown by  
28 several research groups to severely affect downstream analyses. To facilitate the need of  
29 removing scanner effects in a distributed data setting, we introduce distributed ComBat, an  
30 adaptation of a popular harmonization method for multivariate data that borrows informa-  
31 tion across features. We present our fast and simple distributed algorithm and show that it  
32 yields equivalent results using data from the Alzheimer’s Disease Neuroimaging Initiative.  
33 Our method enables harmonization while ensuring maximal privacy protection, thus facili-  
34 tating a broad range of downstream analyses in functional and structural imaging studies.

## 35 Keywords

36 Harmonization; Distributed analysis; Site effect; ComBat; Privacy-preserving

## 37 1 Introduction

38 Sharing data across medical institutions enables large-scale clinical research with more  
39 generalizable and impactful results. However, directly transferring data across organizations  
40 presents a number of issues including patient privacy concerns, incompatibility of data for-  
41 mats, and hardware limitations. In many cases, these concerns prevent data aggregation  
42 in their complete form. This distributed data setting has motivated several adaptations of  
43 common methods that operate without the need to share original data across sites. Re-  
44 cent developments have included distributed clustering (İnan et al., 2007), logistic regression  
45 (Duan et al., 2020a), Cox regression (Duan et al., 2020b), principal component analysis  
46 (Al-Rubaie et al., 2017), and deep learning (Shokri & Shmatikov, 2015).

47 In neuroimaging, performing analyses across multiple institutions and scanners can in-  
48 troduce systematic measurement errors, which are often called scanner effects. These effects  
49 can be introduced by several scanner properties including scanner manufacturer, model,  
50 magnetic field strength, head coil, voxel size, acquisition parameters, and a wide range of  
51 other differences across scanners (Han et al., 2006; Kruggel et al., 2010; Reig et al., 2009;  
52 Wonderlick et al., 2009). Differences can even persist when scanners have the exact same  
53 model and manufacturer (Shinohara et al., 2017).

54 Distributed analysis methods generally do not account for potential scanner effects or  
55 other types of batch effects. However, these effects are important to address and can other-  
56 wise lead to spurious associations and scanner-specific data properties that are easily detected  
57 using a classifier (Fortin et al., 2018; Glocker et al., 2019).

58 To mitigate scanner effects, a wide range of statistical harmonization techniques have  
59 been tested in neuroimaging data. Many of these methods address scanner effects in the  
60 mean and variance of voxel intensities or derived features (Fortin et al., 2016, 2018). Among  
61 these, ComBat (Johnson et al., 2007) has become a popular harmonization method and has  
62 been tested in both structural and functional imaging (Bartlett et al., 2018; Fortin et al.,  
63 2017; Marek et al., 2019; Yu et al., 2018). However, none of these methods can be directly  
64 applied to distributed data.

65 To enable harmonization in distributed data, we introduce distributed ComBat (d-  
66 ComBat), a distributed algorithm for performing ComBat. We apply our algorithm to  
67 the Alzheimer’s Disease Neuroimaging Initiative (ADNI) dataset and show that our method  
68 yields identical results to applying ComBat while having the full data at a single location.  
69 Our investigation enables additional downstream distributed methods to be applied on har-  
70 monized data and fulfills the needs for running a complete distributed analysis pipeline in  
71 multi-site neuroimaging studies.

## 72 2 Methods

### 73 2.1 Distributed ComBat

74 ComBat (Fortin et al., 2017, 2018; Johnson et al., 2007) seeks to remove scanner effects  
75 in the mean and variance of neuroimaging data in an empirical Bayes framework. To handle  
76 the distributed data setting, we propose d-ComBat as an algorithm that yields adjusted data  
77 identical to the original ComBat method. Let  $\mathbf{y}_{ij} = (y_{ij1}, y_{ij2}, \dots, y_{ijv})^T$ ,  $i = 1, 2, \dots, K$ ,  
78  $j = 1, 2, \dots, n_i$  denote the  $v$ -dimensional vectors of observed data where  $i$  indexes scanner,  
79  $j$  indexes subjects within scanners,  $n_i$  is the number of subjects acquired on scanner  $i$ , and  
80  $V$  is the number of features. For simplicity, we assume each site uses a different scanner  
81 and the data are collected from  $K$  sites. However, our algorithm could be easily extended  
82 to allow varying number of scanners per site. Our goal is to harmonize the data from these  
83  $N = \sum_{i=1}^K n_i$  subjects across the  $K$  scanners without pooling data at a single processing  
84 site. ComBat assumes that the  $V$  features  $v = 1, 2, \dots, V$  follow

$$y_{ijv} = \alpha_v + \mathbf{x}_{ij}^T \boldsymbol{\beta}_v + \gamma_{iv} + \delta_{iv} e_{ijv} \quad (1)$$

85 where  $\alpha_v$  is the intercept,  $\mathbf{x}_{ij}$  is the vector of covariates,  $\boldsymbol{\beta}_v$  is the vector of regression  
 86 coefficients,  $\gamma_{iv}$  is the mean scanner effect, and  $\delta_{iv}$  is the variance scanner effect. The errors  
 87  $e_{ijv}$  are assumed to follow  $e_{ijv} \sim N(0, \sigma_v^2)$ .

88 The original ComBat contains two steps. The first is to standardize the original features  
 89 by removing the covariate effects and scaling each residuals by its total variance. The second  
 90 step involves estimating the scanner effects  $\gamma$  and  $\delta$  using an empirical Bayes framework and  
 91 removing them from the original data. We propose a distributed algorithm for each of the  
 92 two steps in the next two sections.

93

## 94 Standardization

95

96 The original implementation of ComBat first standardizes the mean and variance of  
 97 data across scanners via feature-wise least-squares estimation. The standardized data are  
 98 calculated as

$$z_{ijv} = \frac{y_{ijv} - \hat{\alpha}_v - X_{ij}\hat{\boldsymbol{\beta}}_v}{\hat{\sigma}_v}$$

99 However, in the distributed setting we do not have direct access to the entire dataset and  
 100 cannot directly compute estimates for the intercepts  $\alpha_v$ , regression coefficients  $\boldsymbol{\beta}_v$ , scanner-  
 101 specific mean shifts  $\gamma_{iv}$  or population standard deviations  $\sigma_v$  for each feature. To address  
 102 this problem, we propose an estimation procedure that only requires computation and  
 103 transmission of deidentified summary statistics between distributed sites and a central loca-  
 104 tion. As in the original ComBat methodology, estimation is performed under the constraint  
 105  $\sum_{i=1}^K n_i \hat{\gamma}_{iv} = 0$  to ensure identifiability.

For each feature, define  $\boldsymbol{\theta}_v = (\alpha_v, \boldsymbol{\beta}_v^T, \gamma_{1v}, \gamma_{2v}, \dots, \gamma_{K-1,v})^T$ . Then we can rewrite the  
 data across all  $N$  subjects  $\mathbf{y}_v = (y_{11v}, \dots, y_{1n_1v}, y_{21v}, \dots, y_{2n_2v}, \dots, y_{Mn_Mv})^T$  as  $\mathbf{y}_v = W\boldsymbol{\theta}_v + e_v$   
 where

$$W = \begin{bmatrix} W_1 \\ \vdots \\ W_K \end{bmatrix} = \begin{bmatrix} \mathbf{1}_{n_1} & X_1 & \mathbf{1}_{n_1} & \cdots & \mathbf{0}_{n_1} & \mathbf{0}_{n_1} \\ \vdots & \vdots & \vdots & & \vdots & \vdots \\ \mathbf{1}_{n_{M-1}} & X_{K-1} & \mathbf{0}_{n_{K-1}} & \cdots & \mathbf{1}_{n_{K-1}} & \mathbf{0}_{n_{K-1}} \\ \mathbf{1}_{n_K} & X_K & -n_1/n_K \mathbf{1}_{n_K} & \cdots & -n_{K-2}/n_K \mathbf{1}_{n_K} & -n_{K-1}/n_K \mathbf{1}_{n_K} \end{bmatrix}$$

106 The ordinary least squares estimate can be obtained via  $\hat{\boldsymbol{\theta}}_v = (W^T W)^{-1} (W^T Y_v) =$   
 107  $\left( \sum_{i=1}^K W_i^T W_i \right)^{-1} \left( \sum_{i=1}^K W_i \mathbf{y}_v \right)$ . By decomposing the estimation into site-specific summary  
 108 statistics  $W_i^T W_i$  and  $W_i \mathbf{y}_v$ ,  $\hat{\boldsymbol{\theta}}_v$  can be obtained by computing these summary statistics and  
 109 sending them to a central location. Construction of  $W_i$  and calculation of these summary  
 110 statistics are simple for  $i = 1, 2, \dots, K-1$  since they are just the usual design matrices  $X_i$  con-  
 111 catenated with an intercept column and scanner-specific columns of ones. To standardize the

112 variance of the data, the marginal variance is estimated as  $\hat{\sigma}_v^2 = \frac{1}{N} \sum_{ij} (y_{ijv} - \hat{\alpha}_v - X_{ij} \hat{\beta}_v - \hat{\gamma}_{iv}^2,$   
 113  $v = 1, 2, \dots, p,$  which is decomposable by site.

114

## 115 Empirical Bayes adjustment

116

117 The key step in ComBat involves use of empirical Bayes estimates of site-specific location  
 118 and scale parameters to remove site effects while pooling information across features. Com-  
 119 Bat assumes that the prior distributions  $\gamma_{iv} \sim N(\gamma_i, \tau_i^2)$  and  $\delta_{iv}^2 \sim \text{Inverse Gamma}(\lambda_i, \nu_i)$   
 120 where hyperparameter estimates  $\bar{\gamma}_i, \bar{\tau}_i, \bar{\lambda}_i,$  and  $\bar{\nu}_i$  are obtained via method of moments. Com-  
 121 Bat then finds the conditional posterior means  $\gamma_{iv}^*$  and  $\delta_{iv}^*$ , computed iteratively through

$$\gamma_{iv}^* = \frac{n_i \bar{\tau}_i^2 \hat{\gamma}_{iv} + \delta_{iv}^2 \bar{\gamma}_i}{n_i \bar{\tau}_i^2 + \delta_{iv}^{2*}}$$

$$\delta_{iv}^{2*} = \frac{\bar{\nu}_i + \frac{1}{2} \sum_j (Z_{ijv} - \gamma_{iv}^*)^2}{\frac{n_i}{2} + \bar{\lambda}_i - 1}$$

122 Each site's mean and variance parameter estimates are computed from data within that  
 123 site and so this step is distributed by its nature. The ComBat-adjusted data is then obtained  
 124 within each site via

$$y_{ijv}^{\text{ComBat}} = \frac{\hat{\sigma}_v}{\delta_{iv}^*} (z_{ijv} - \hat{\gamma}_{iv}^*) + \hat{\alpha}_v + X_{ij} \hat{\beta}_v$$

125

126

## 127 Algorithm

128 In the distributed setting, ComBat only requires two back-and-forth communications be-  
 129 tween sites and a central location for estimation of the standardization parameters. We  
 130 propose the d-ComBat algorithm and illustrate our method in Fig. 1

131 1. Initiation - broadcast from central site: The central analysis site chooses identification  
 132 numbers for each scanner and communicates these to each location.

133 2. Local computation at collaborative sites for mean parameters.

134 (a) Each site locally computes scanner-specific summary statistics  $W_i^T W_i$  and  $W_i \mathbf{y}_v$   
 135 to the central site (Fig. 1a).

136 (b) These summary statistics are then sent back to the central site.

137 3. Aggregation at central site and broadcast.

- 138 (a) From the scanner-specific summary statistics, the central site computes  $\hat{\theta}_v$ .
- 139 (b) The central site then sends  $\hat{\theta}_v$  to each location (Fig. 1a).
- 140 4. Distributed data harmonizations.
- 141 (a) To obtain the global variance estimate, each site transfers  $\sum_j (y_{ijv} - \hat{\alpha}_v - X_{ij}\hat{\beta}_v - \hat{\gamma}_{iv}^2)$  to the central location, which then sends back  $\hat{\sigma}_v$  (Fig. 1b).
- 142
- 143 (b) The remaining ComBat steps are performed within each site to obtain  $y_i^{ComBat}$  at
- 144 every location (Fig. 1c).

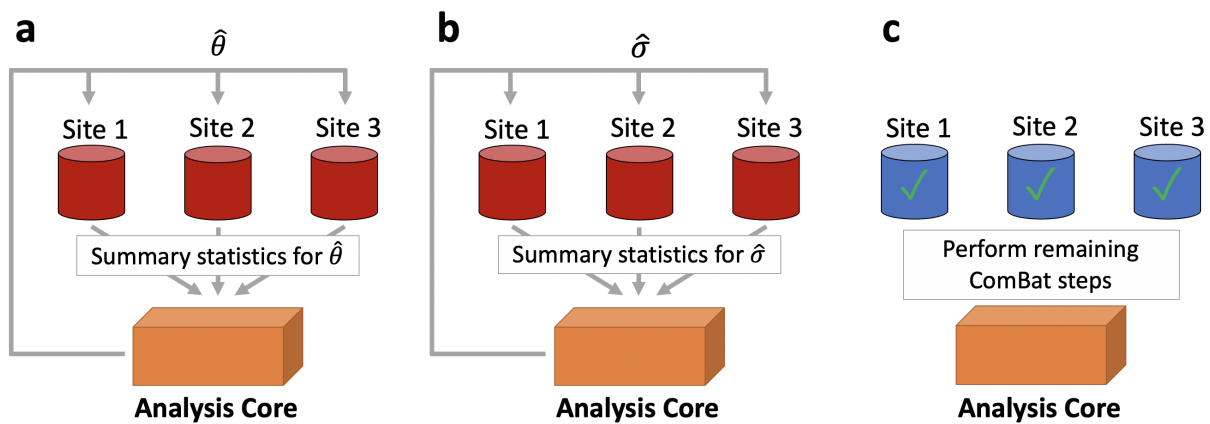

Figure 1: **Distributed ComBat illustration.** The procedure to perform distributed ComBat harmonization is outlined as follows. **a**, Each site sends its deidentified summary statistics to a central site for estimation of regression coefficients which are then passed back to the sites. **b**, Each site sends summary statistics to a central site for estimation of the population variance which is then passed back to the sites. **c**, The sites can then use the global regression coefficients and variance estimates to perform the remaining ComBat steps and obtain harmonized data.

## 145 2.2 ADNI data analysis

146 Data for our primary analysis are obtained from ADNI (<http://adni.loni.usc.edu/> and  
 147 processed using the ANTs longitudinal single-subject template pipeline (Tustison et al., 2019)  
 148 with code available on GitHub (<https://github.com/ntustison/CrossLong>). All participants  
 149 in the ADNI study gave informed consent and institutional review boards approved the study  
 150 at all contributing institutions.

151 First, we obtain raw T1-weighted images from the ADNI-1 database, which were ac-  
152 quired using MPRAGE for Siemens and Philips scanners and a works-in-progress version  
153 of MPRAGE on GE scanners (Jack et al., 2010). For each subject, we estimate a tem-  
154 plate from all the image timepoints. Each normalized timepoint image undergoes rigid  
155 spatial normalization to this single-subject template followed by processing via a single im-  
156 age cortical thickness pipeline consisting of brain extraction (Avants et al., 2010), denoising  
157 (Manjón et al., 2010), N4 bias correction (Tustison et al., 2010), Atropos n-tissue segmen-  
158 tation (Avants et al., 2011), and registration-based cortical thickness estimation (Das et al.,  
159 2009). We include the 62 cortical thickness values from the baseline scans in our primary  
160 dataset.

161 We then identified scanner based on information contained within the Digital Imaging  
162 and Communications in Medicine (DICOM) headers for each scan. We consider subjects  
163 to be acquired on the same scanner if they share the scanner site, scanner manufacturer,  
164 scanner model, head coil, and magnetic field strength. In total, this definition yields 142  
165 distinct scanners of which 78 had less than three subjects and were removed from analyses.  
166 The final sample consists of 505 subjects across 64 scanners, with 213 subjects imaged on  
167 scanners manufactured by Siemens, 70 by Philips, and 222 by GE. These 64 scanners are  
168 divided across 53 distinct ADNI sites. The sample has a mean age of 75.3 (SD 6.70) and  
169 includes 278 (55%) males, 115 (22.8%) Alzheimer’s disease (AD) patients, 239 (47.3%) late  
170 mild cognitive impairment (LMCI), and 151 (29.9%) cognitively normal (CN) individuals.

## 171 **2.3 Comparison with ComBat**

172 We conduct an experiment to compare d-ComBat and ComBat applied on the full data  
173 available at a single location. To emulate a distributed data setting, we treat each of the  
174 53 ADNI sites as separate locations and only enable sharing of summary statistics with a  
175 central location. We then apply d-ComBat to this data while including age, sex, and disease  
176 status as covariates. For the reference ComBat-adjusted data, we apply ComBat including  
177 the same covariates while all of the data is housed at a single site.

178 We also compare these two ComBat outputs by comparing their parameter estimates,  
179 harmonized output data, and run time. Parameter estimates are compared through the  
180 maximum difference between the two sets of estimates. We then compare the harmonized  
181 data within each site and report the maximum error across all sites. For run time, we  
182 compare the ComBat run time with the time elapsed across all d-ComBat steps, including  
183 calculations at the central location.

### 184 3 Results

185 We ran d-ComBat and ComBat in R on a laptop computer running macOS Catalina  
186 version 10.15.7 with a 2.3 GHz 8-Core Intel Core i9 processor. D-ComBat ran in 387 mil-  
187 liseconds across all sites and steps versus ComBat which took 40 milliseconds. The average  
188 run time within each site was 7.04 milliseconds and the central site took 6 milliseconds to  
189 compute the necessary estimates.

190 Fig. 2 compare the empirical Bayes parameter estimates and regression coefficients ob-  
191 tained from each method, showing no visible differences across all parameters. The maximum  
192 percent differences between estimates were  $4.17 \times 10^{-10}$  for location parameters,  $1.72 \times 10^{-13}$   
193 for scale parameters, and  $1.19 \times 10^{-11}$  for regression coefficients.

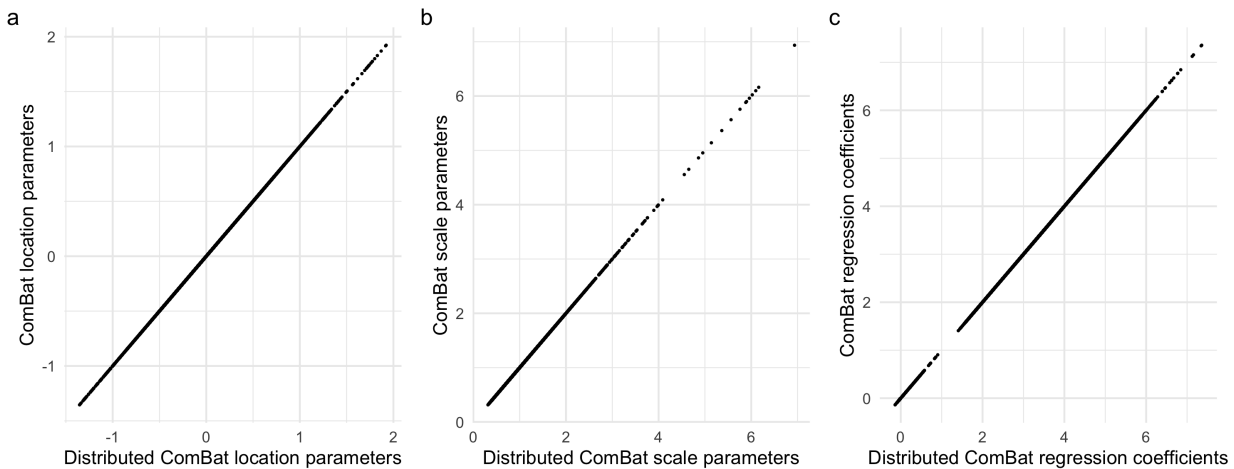

Figure 2: **Distributed ComBat parameter estimates.** Scatter plots compare parameter estimates from distributed ComBat versus those obtained from ComBat with all data at one location. **a** and **b** show empirical Bayes point estimates for location and scale respectively. **c** displays the regression coefficients obtained from each method.

194 The harmonized data were identical between the two methods. We found that the maxi-  
195 mum percent difference between any two data points across the 53 locations was  $2.75 \times 10^{-13}$ .

### 196 4 Discussion

197 Challenges in data sharing across institutions have inspired distributed algorithms for  
198 statistical analysis and machine learning. We contribute to this growing base of methods  
199 by introducing distributed ComBat for harmonization of data housed in clinical sites. To  
200 the best of our knowledge, this is the first harmonization method adapted for this setting.



201 Compared to ComBat, we demonstrate that d-ComBat yields identical parameter estimates  
202 and harmonized output data.

203 Unlike ComBat, d-ComBat requires two round of communications with a central location,  
204 which requires coordination and sharing of deidentified summary statistics between sites.  
205 These additional steps result in greater total run time across all sites, but very short run  
206 times at each site. In practice, the execution time of d-ComBat will also depend on the  
207 transfer speed of summary statistics to the central location and the speed of individuals  
208 running the code at each site. The total time to run d-ComBat is likely greater than running  
209 ComBat while having data at a single location, but this additional time is expected given  
210 the complexities of a distributed data setting. Further investigation into approximating the  
211 standardization step in one communication step could greatly improve the ease of using  
212 d-ComBat.

213 For distributed Combat, only aggregated statistics are communicated, and the re-identification  
214 risk for the patients is expected to be low. In the future, we plan to formally quantify the  
215 re-identification risk rigorously, and enhance our algorithms via techniques including differ-  
216 ential privacy (Dwork & Roth, 2014; Dwork et al., 2016; Wasserman & Zhou, 2010). Future  
217 studies could also adapt other harmonization methods for distributed data, including exten-  
218 sions of ComBat for longitudinal data (Beer et al., 2020), nonlinear associations (Pomponio  
219 et al., 2020), and covariance effects (Chen et al., 2019).

## 220 References

- 221 AL-RUBAIE, M., WU, P., CHANG, J. M. & KUNG, S. (2017). Privacy-preserving PCA  
222 on horizontally-partitioned data. In *2017 IEEE Conference on Dependable and Secure*  
223 *Computing*.
- 224 AVANTS, B., KLEIN, A., TUSTISON, N., WOO, J. & GEE, J. C. (2010). Evaluation of  
225 open-access, automated brain extraction methods on multi-site multi-disorder data. In  
226 *16th Annual Meeting for the Organization of Human Brain Mapping*.
- 227 AVANTS, B. B., TUSTISON, N. J., WU, J., COOK, P. A. & GEE, J. C. (2011). An open  
228 source multivariate framework for n-tissue segmentation with evaluation on public data.  
229 *Neuroinformatics* **9**, 381–400.
- 230 BARTLETT, E. A., DELORENZO, C., SHARMA, P., YANG, J., ZHANG, M., PETKOVA,  
231 E., WEISSMAN, M., MCGRATH, P. J., FAVA, M., OGDEN, R. T., KURIAN, B. T.,  
232 MALCHOW, A., COOPER, C. M., TROMBELLO, J. M., MCINNIS, M., ADAMS, P.,  
233 OQUENDO, M. A., PIZZAGALLI, D. A., TRIVEDI, M. & PARSEY, R. V. (2018). Pretreat-  
234 ment and early-treatment cortical thickness is associated with SSRI treatment response  
235 in major depressive disorder. *Neuropsychopharmacology* **43**, 2221–2230.
- 236 BEER, J. C., TUSTISON, N. J., COOK, P. A., DAVATZIKOS, C., SHELINE, Y. I., SHINO-  
237 HARA, R. T. & LINN, K. A. (2020). Longitudinal ComBat: A method for harmonizing  
238 longitudinal multi-scanner imaging data. *NeuroImage* **220**, 117129.
- 239 CHEN, A. A., BEER, J. C., TUSTISON, N. J., COOK, P. A., SHINOHARA, R. T. &  
240 SHOU, H. (2019). Removal of Scanner Effects in Covariance Improves Multivariate Pattern  
241 Analysis in Neuroimaging Data. *bioRxiv* , 858415.
- 242 DAS, S. R., AVANTS, B. B., GROSSMAN, M. & GEE, J. C. (2009). Registration based  
243 cortical thickness measurement. *NeuroImage* **45**, 867–879.
- 244 DUAN, R., BOLAND, M. R., LIU, Z., LIU, Y., CHANG, H. H., XU, H., CHU, H., SCHMID,  
245 C. H., FORREST, C. B., HOLMES, J. H., SCHUEMIE, M. J., BERLIN, J. A., MOORE,  
246 J. H. & CHEN, Y. (2020a). Learning from electronic health records across multiple sites:  
247 A communication-efficient and privacy-preserving distributed algorithm. *Journal of the*  
248 *American Medical Informatics Association* **27**, 376–385.
- 249 DUAN, R., LUO, C., SCHUEMIE, M. J., TONG, J., LIANG, C. J., CHANG, H. H., BOLAND,  
250 M. R., BIAN, J., XU, H., HOLMES, J. H., FORREST, C. B., MORTON, S. C., BERLIN,

- 251 J. A., MOORE, J. H., MAHONEY, K. B. & CHEN, Y. (2020b). Learning from local to  
252 global: An efficient distributed algorithm for modeling time-to-event data. *Journal of the*  
253 *American Medical Informatics Association* **27**, 1028–1036.
- 254 DWORK, C., MCSHERRY, F., NISSIM, K. & SMITH, A. (2016). Calibrating Noise to  
255 Sensitivity in Private Data Analysis. *Journal of Privacy and Confidentiality* **7**, 17–51.
- 256 DWORK, C. & ROTH, A. (2014). The Algorithmic Foundations of Differential Privacy.  
257 *Foundations and Trends® in Theoretical Computer Science* **9**, 211–407.
- 258 FORTIN, J.-P., CULLEN, N., SHELINE, Y. I., TAYLOR, W. D., ASELCIOGLU, I., COOK,  
259 P. A., ADAMS, P., COOPER, C., FAVA, M., MCGRATH, P. J., MCINNIS, M., PHILLIPS,  
260 M. L., TRIVEDI, M. H., WEISSMAN, M. M. & SHINOHARA, R. T. (2018). Harmo-  
261 nization of cortical thickness measurements across scanners and sites. *NeuroImage* **167**,  
262 104–120.
- 263 FORTIN, J.-P., PARKER, D., TUNÇ, B., WATANABE, T., ELLIOTT, M. A., RUPAREL, K.,  
264 ROALF, D. R., SATTERTHWAITE, T. D., GUR, R. C., GUR, R. E., SCHULTZ, R. T.,  
265 VERMA, R. & SHINOHARA, R. T. (2017). Harmonization of multi-site diffusion tensor  
266 imaging data. *NeuroImage* **161**, 149–170.
- 267 FORTIN, J.-P., SWEENEY, E. M., MUSCHELLI, J., CRAINICEANU, C. M. & SHINOHARA,  
268 R. T. (2016). Removing inter-subject technical variability in magnetic resonance imaging  
269 studies. *NeuroImage* **132**, 198–212.
- 270 GLOCKER, B., ROBINSON, R., CASTRO, D. C., DOU, Q. & KONUKOGLU, E. (2019).  
271 Machine Learning with Multi-Site Imaging Data: An Empirical Study on the Impact of  
272 Scanner Effects. *arXiv:1910.04597 [cs, eess, q-bio]* .
- 273 HAN, X., JOVICICH, J., SALAT, D., VAN DER KOUWE, A., QUINN, B., CZANNER, S.,  
274 BUSA, E., PACHECO, J., ALBERT, M., KILLIANY, R., MAGUIRE, P., ROSAS, D.,  
275 MAKRIS, N., DALE, A., DICKERSON, B. & FISCHL, B. (2006). Reliability of MRI-  
276 derived measurements of human cerebral cortical thickness: The effects of field strength,  
277 scanner upgrade and manufacturer. *NeuroImage* **32**, 180–194.
- 278 İNAN, A., KAYA, S. V., SAYGIN, Y., SAVAŞ, E., HINTOĞLU, A. A. & LEVI, A. (2007).  
279 Privacy preserving clustering on horizontally partitioned data. *Data & Knowledge Engi-*  
280 *neering* **63**, 646–666.

- 281 JACK, C. R., BERNSTEIN, M. A., BOROWSKI, B. J., GUNTER, J. L., FOX, N. C.,  
282 THOMPSON, P. M., SCHUFF, N., KRUEGER, G., KILLIANY, R. J., DECARLI, C. S.,  
283 DALE, A. M. & WEINER, M. W. (2010). Update on the MRI Core of the Alzheimer's  
284 Disease Neuroimaging Initiative. *Alzheimer's & dementia : the journal of the Alzheimer's*  
285 *Association* **6**, 212–220.
- 286 JOHNSON, W. E., LI, C. & RABINOVIC, A. (2007). Adjusting batch effects in microarray  
287 expression data using empirical Bayes methods. *Biostatistics* **8**, 118–127.
- 288 KRUGGEL, F., TURNER, J., MUFTULER, L. T. & ALZHEIMER'S DISEASE NEUROIMAGING  
289 INITIATIVE (2010). Impact of scanner hardware and imaging protocol on image quality  
290 and compartment volume precision in the ADNI cohort. *NeuroImage* **49**, 2123–2133.
- 291 MANJÓN, J. V., COUPÉ, P., MARTÍ-BONMATÍ, L., COLLINS, D. L. & ROBLES, M.  
292 (2010). Adaptive non-local means denoising of MR images with spatially varying noise  
293 levels. *Journal of magnetic resonance imaging: JMRI* **31**, 192–203.
- 294 MAREK, S., TERVO-CLEMMENS, B., NIELSEN, A. N., WHEELLOCK, M. D., MILLER,  
295 R. L., LAUMANN, T. O., EARL, E., FORAN, W. W., CORDOVA, M., DOYLE, O.,  
296 PERRONE, A., MIRANDA-DOMINGUEZ, O., FECZKO, E., STURGEON, D., GRAHAM,  
297 A., HERMOSILLO, R., SNIDER, K., GALASSI, A., NAGEL, B. J., EWING, S. W. F.,  
298 EGGBRECHT, A. T., GARAVAN, H., DALE, A. M., GREENE, D. J., BARCH, D. M.,  
299 FAIR, D. A., LUNA, B. & DOSENBACH, N. U. F. (2019). Identifying reproducible indi-  
300 vidual differences in childhood functional brain networks: An ABCD study. *Developmental*  
301 *Cognitive Neuroscience* **40**, 100706.
- 302 POMPONIO, R., ERUS, G., HABES, M., DOSHI, J., SRINIVASAN, D., MAMOURIAN, E.,  
303 BASHYAM, V., NASRALLAH, I. M., SATTERTHWAITE, T. D., FAN, Y., LAUNER, L. J.,  
304 MASTERS, C. L., MARUFF, P., ZHUO, C., VÖLZKE, H., JOHNSON, S. C., FRIPP,  
305 J., KOUTSOULERIS, N., WOLF, D. H., GUR, R., GUR, R., MORRIS, J., ALBERT,  
306 M. S., GRABE, H. J., RESNICK, S. M., BRYAN, R. N., WOLK, D. A., SHINOHARA,  
307 R. T., SHOU, H. & DAVATZIKOS, C. (2020). Harmonization of large MRI datasets for  
308 the analysis of brain imaging patterns throughout the lifespan. *NeuroImage* **208**, 116450.
- 309 REIG, S., SÁNCHEZ-GONZÁLEZ, J., ARANGO, C., CASTRO, J., GONZÁLEZ-PINTO, A.,  
310 ORTUÑO, F., CRESPO-FACORRO, B., BARGALLÓ, N. & DESCO, M. (2009). Assessment  
311 of the increase in variability when combining volumetric data from different scanners.  
312 *Human Brain Mapping* **30**, 355–368.

- 313 SHINOHARA, R. T., OH, J., NAIR, G., CALABRESI, P. A., DAVATZIKOS, C., DOSHI, J.,  
314 HENRY, R. G., KIM, G., LINN, K. A., PAPINUTTO, N., PELLETIER, D., PHAM, D. L.,  
315 REICH, D. S., ROONEY, W., ROY, S., STERN, W., TUMMALA, S., YOUSUF, F., ZHU,  
316 A., SICOTTE, N. L., BAKSHI, R. & COOPERATIVE, T. N. (2017). Volumetric Analysis  
317 from a Harmonized Multisite Brain MRI Study of a Single Subject with Multiple Sclerosis.  
318 *American Journal of Neuroradiology* **38**, 1501–1509.
- 319 SHOKRI, R. & SHMATIKOV, V. (2015). Privacy-Preserving Deep Learning. In *Proceedings*  
320 *of the 22nd ACM SIGSAC Conference on Computer and Communications Security, CCS*  
321 '15. New York, NY, USA: Association for Computing Machinery.
- 322 TUSTISON, N. J., AVANTS, B. B., COOK, P. A., ZHENG, Y., EGAN, A., YUSHKEVICH,  
323 P. A. & GEE, J. C. (2010). N4ITK: Improved N3 Bias Correction. *IEEE Transactions*  
324 *on Medical Imaging* **29**, 1310–1320.
- 325 TUSTISON, N. J., HOLBROOK, A. J., AVANTS, B. B., ROBERTS, J. M., COOK, P. A.,  
326 REAGH, Z. M., DUDA, J. T., STONE, J. R., GILLEN, D. L., YASSA, M. A. & INI-  
327 TIATIVE, F. T. A. D. N. (2019). Longitudinal Mapping of Cortical Thickness Measure-  
328 ments: An Alzheimer’s Disease Neuroimaging Initiative-Based Evaluation Study. *Journal*  
329 *of Alzheimer’s Disease* **71**, 165–183.
- 330 WASSERMAN, L. & ZHOU, S. (2010). A Statistical Framework for Differential Privacy.  
331 *Journal of the American Statistical Association* **105**, 375–389.
- 332 WONDERLICK, J., ZIEGLER, D., HOSSEINI-VARNAMKHASTI, P., LOCASCIO, J.,  
333 BAKKOUR, A., VAN DER KOUWE, A., TRIANTAFYLLOU, C., CORKIN, S. & DICK-  
334 ERSON, B. (2009). Reliability of MRI-derived cortical and subcortical morphometric  
335 measures: Effects of pulse sequence, voxel geometry, and parallel imaging. *NeuroImage*  
336 **44**, 1324–1333.
- 337 YU, M., LINN, K. A., COOK, P. A., PHILLIPS, M. L., MCINNIS, M., FAVA, M., TRIVEDI,  
338 M. H., WEISSMAN, M. M., SHINOHARA, R. T. & SHELINE, Y. I. (2018). Statistical  
339 harmonization corrects site effects in functional connectivity measurements from multi-site  
340 fMRI data. *Human Brain Mapping* **39**, 4213–4227.
